# Supplementary material for: Predicting tumor recurrence on baseline MR imaging in patients with early-stage hepatocellular carcinoma using deep machine learning
Source: Springer Nature journal article supplement (doi:10.1038/s41598-023-34439-7), 2023-05-10
Supplement: MOESM1 [file 41598_2023_34439_MOESM1_ESM.pdf]

## Supplementary Information

Title: Predicting tumor recurrence on baseline MR imaging in patients with early-stage hepatocellular carcinoma using deep machine learning

Journal: Scientific Reports

Authors:

Ahmet Said Kucukkaya, Tal Zeevi, Nathan Xianming Chai, Rajiv Raju, Stefan Philipp Haider, Mohamed Elbanan, Alexandra Petukhova-Greenstein, MingDe Lin, John Onofrey, Michal Nowak, Kirsten Cooper, Elizabeth Thomas, Jessica Santana, Bernhard Gebauer, David Mulligan, Lawrence Staib, Ramesh Batra, Julius Chapiro.

Correspondence

Julius Chapiro

Department of Radiology and Biomedical Imaging

Yale University School of Medicine

300 Cedar Street

New Haven, CT 06520

Tel: +1 203 785-2428

Email: [julius.chapiro@yale.edu](mailto:julius.chapiro@yale.edu)

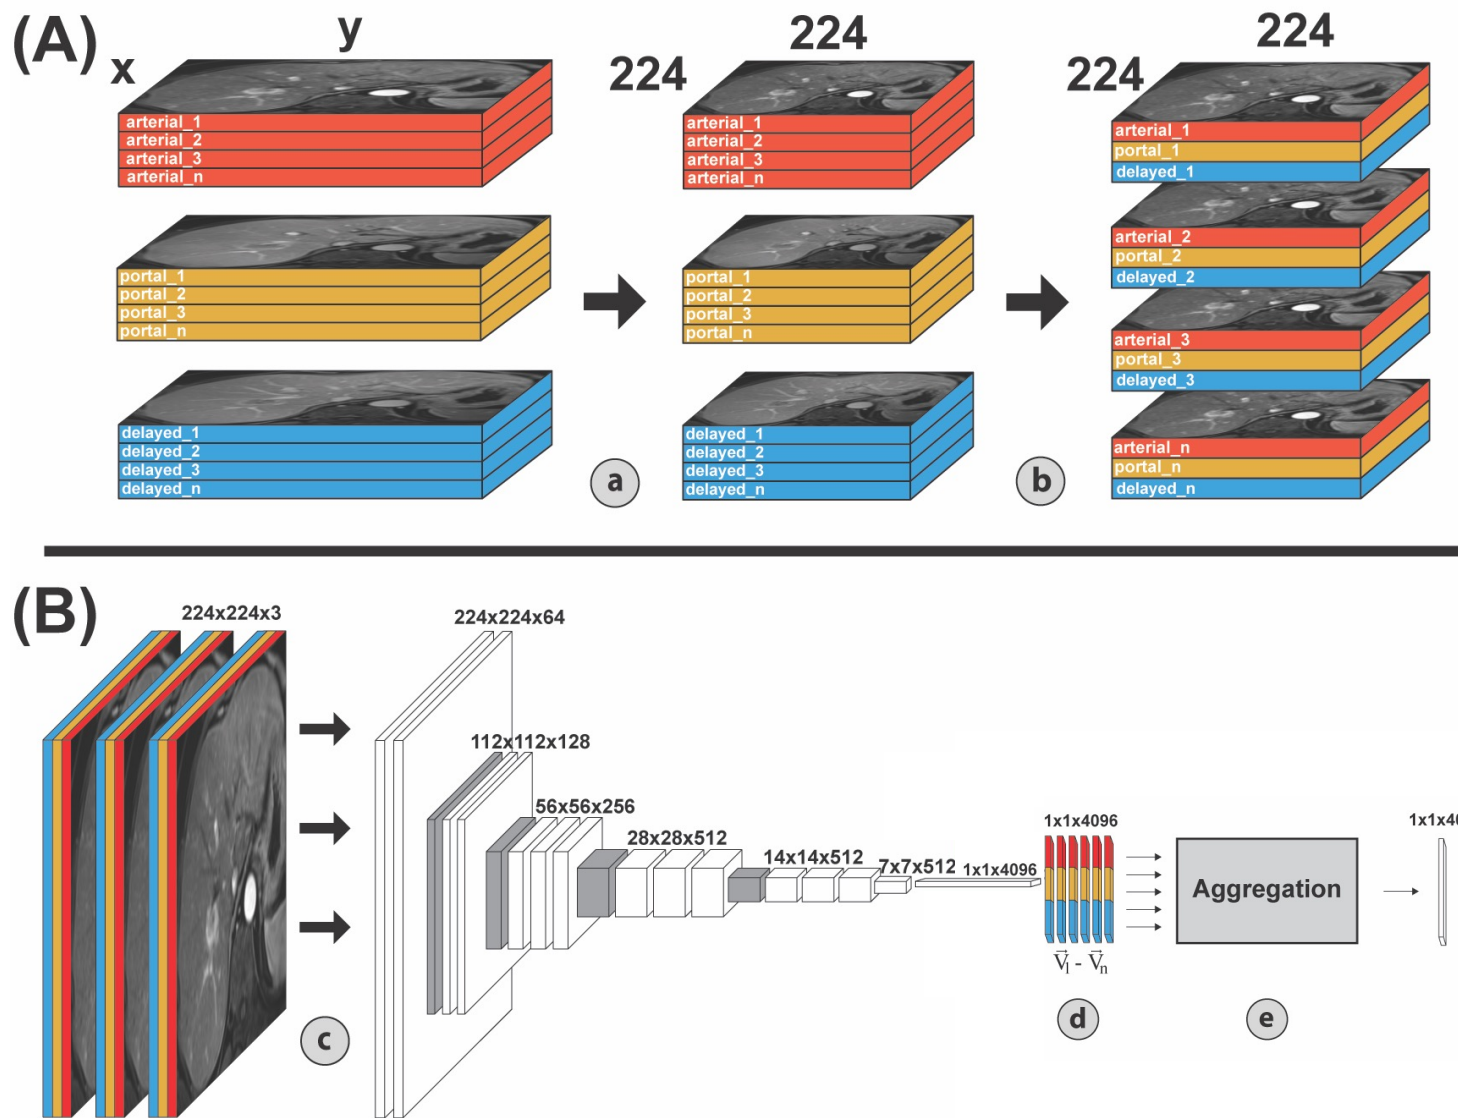

**Supplementary Figure 1.** Detailed overview of the (A) pre-processing and (B) feature extraction pipeline. (a) Tri-phasic MR images were resized to 224x224 pixels (b) and corresponding slices of each phase were stacked. The number of stacks for each patient equals the number of slices in the MR images. (c) Feature extraction was done using VGG16 (d) resulting in one feature vector per stack. (e) Finally, max pooling was applied to obtain a single feature value (aggregation) per patient.

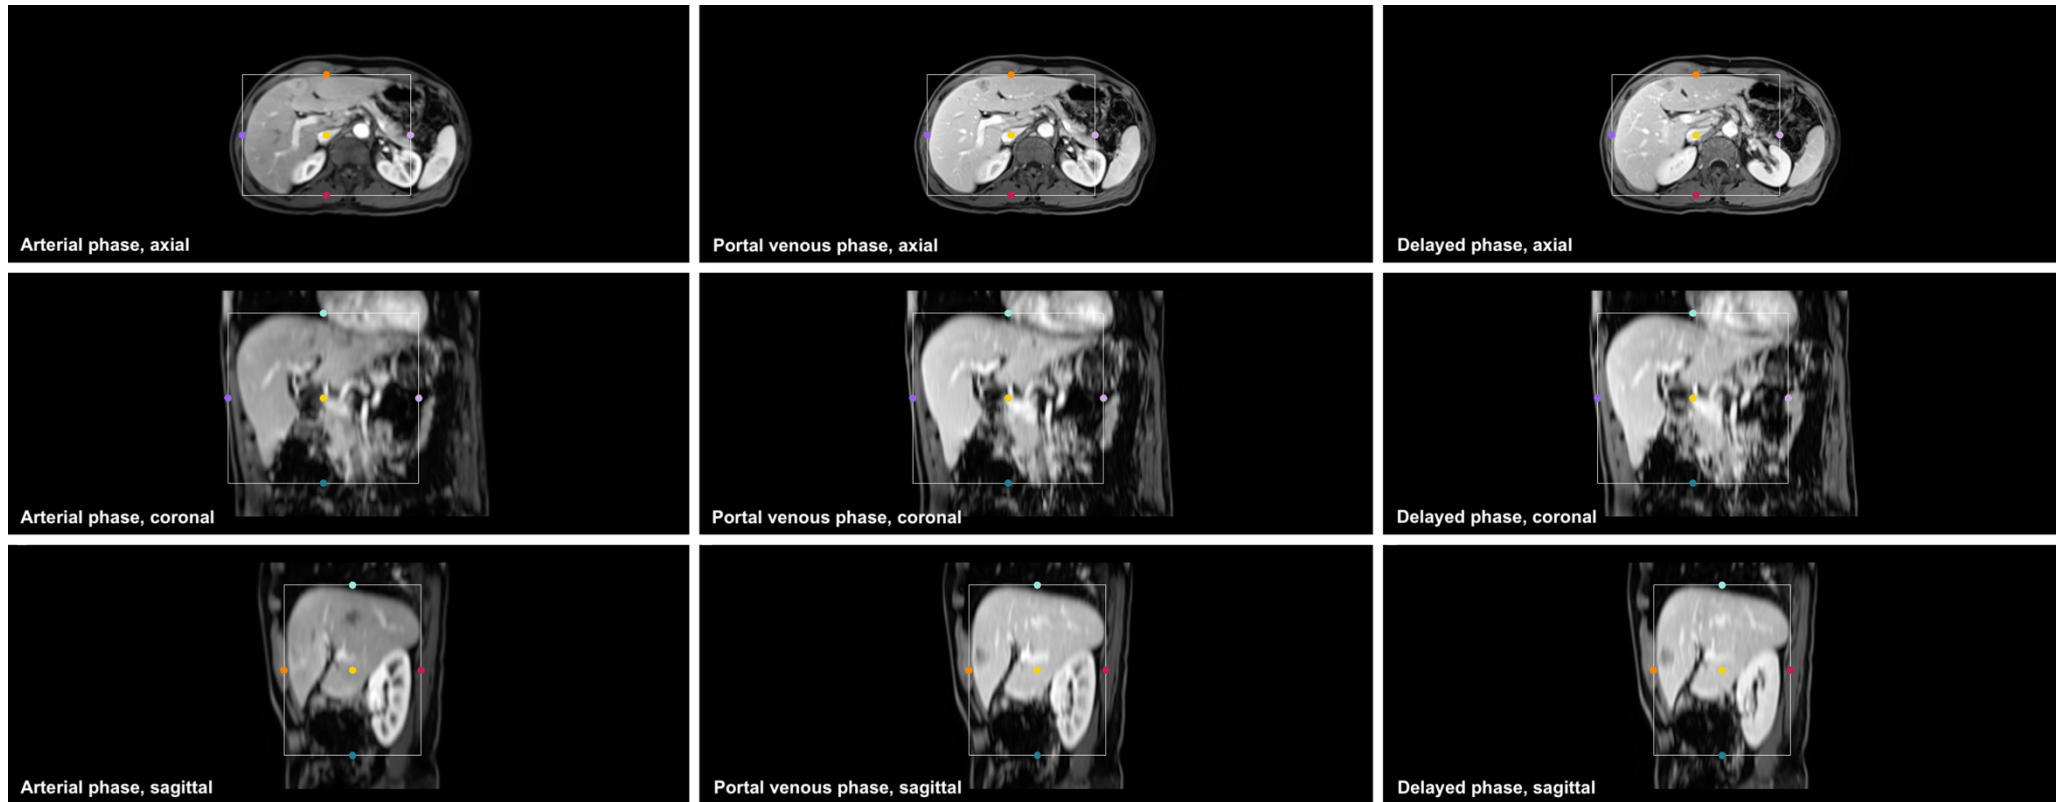

**Supplementary Figure 2.** Example of a bounding box, created in 3DSlicer. Each bounding box was drawn in arterial phase, and then adapted to portal venous and delayed phase imaging. The borders of the box are in line with the largest cross section in every dimension.

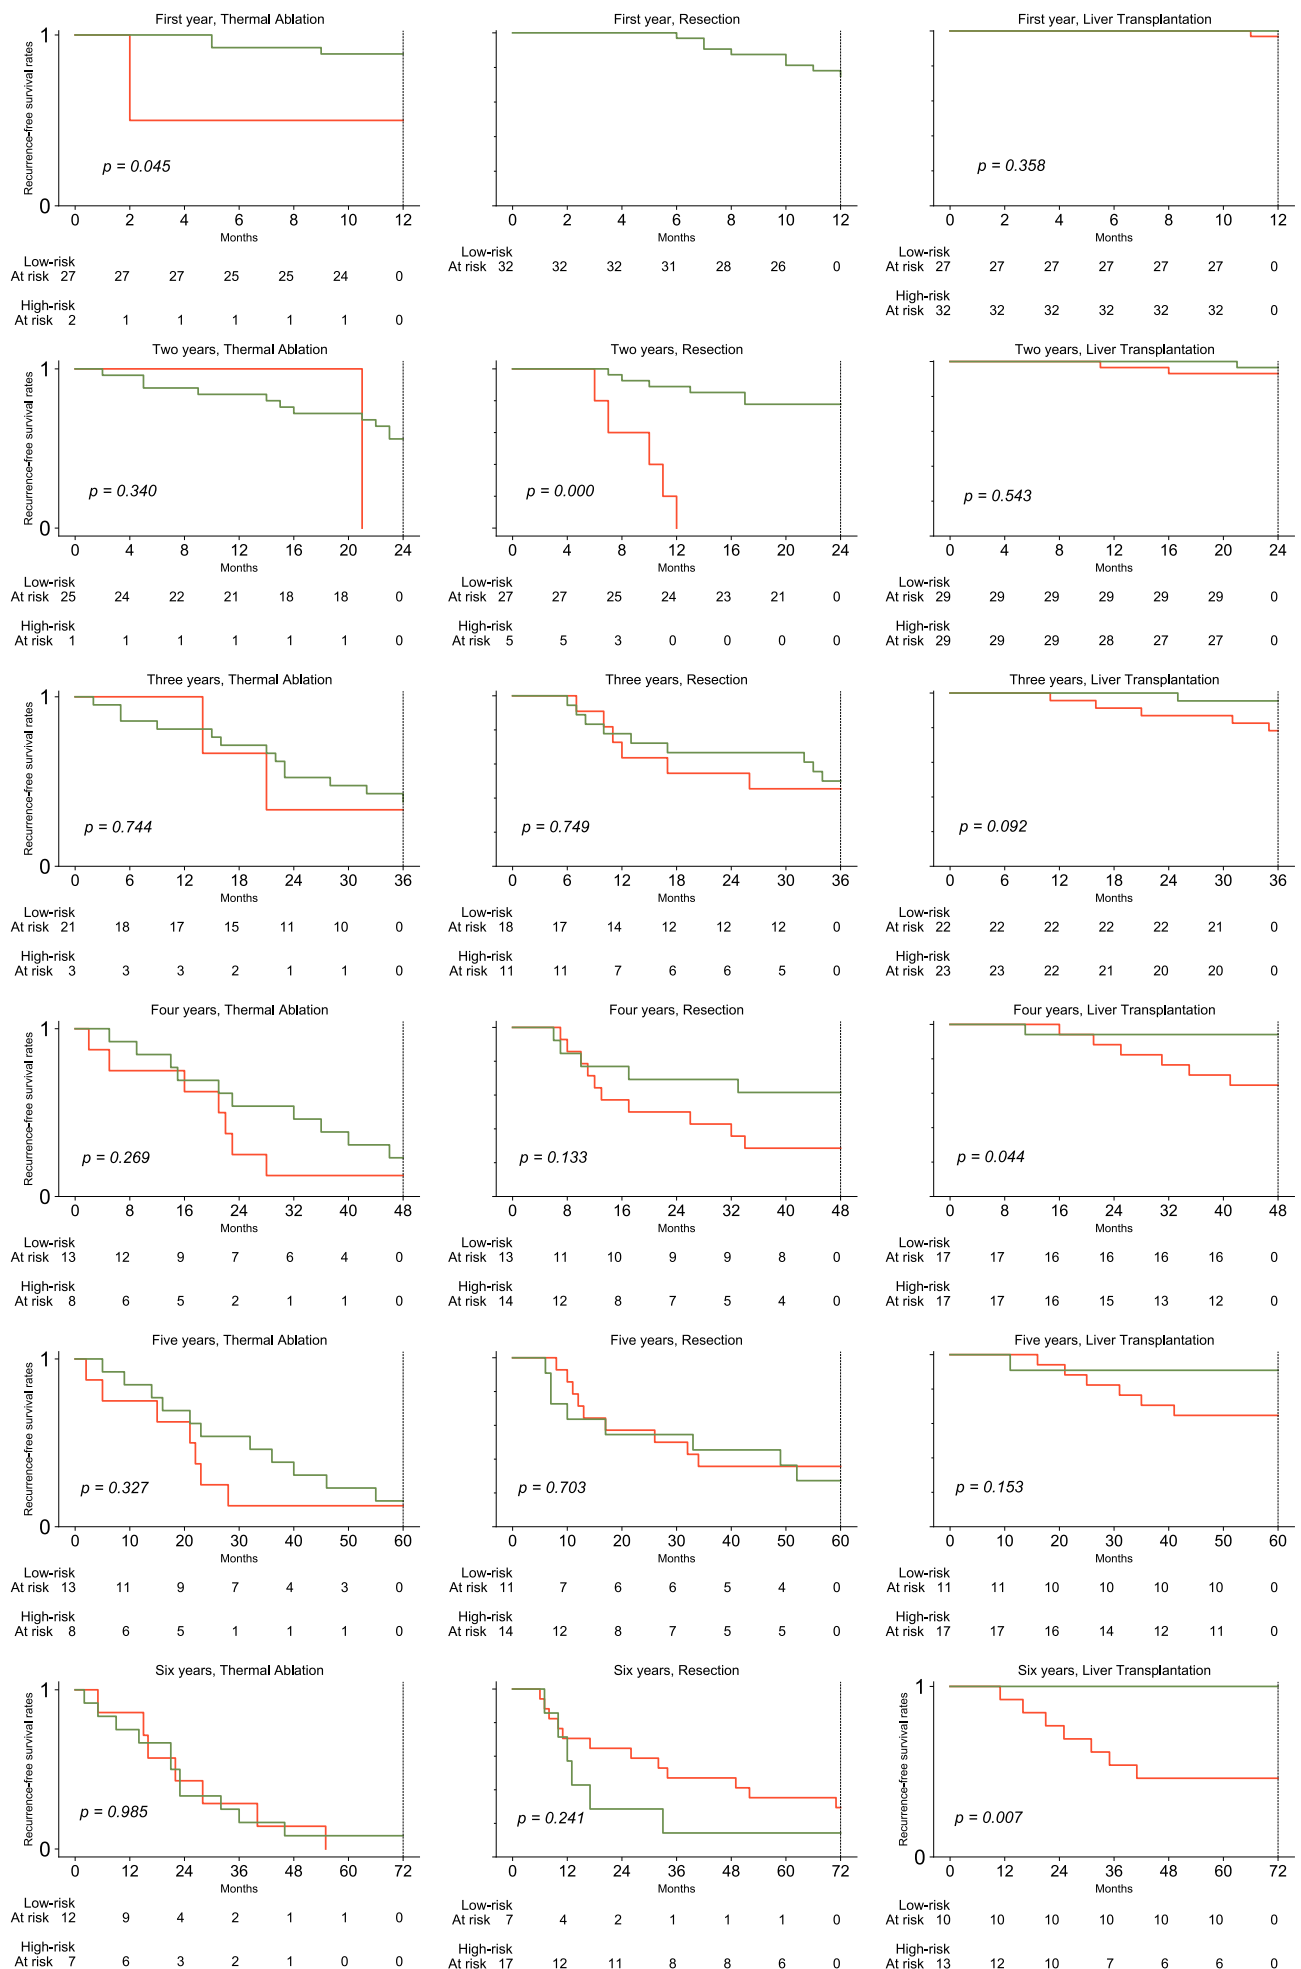

**Supplementary Figure 3.** Kaplan-Meier analysis of RFS for each analyzed time frame and treatment according to algorithm predictions. The plot "First year, Resection" shows only one curve because the algorithm classified all patients as low-risk recurrence.

| <b>Supplementary Table 1. Additional performance metrics for each time frame</b> |                           |          |          |          |          |          |
|----------------------------------------------------------------------------------|---------------------------|----------|----------|----------|----------|----------|
|                                                                                  | <b>Time frame (years)</b> |          |          |          |          |          |
|                                                                                  | <b>1</b>                  | <b>2</b> | <b>3</b> | <b>4</b> | <b>5</b> | <b>6</b> |
| <b>N (recurrence)</b>                                                            | 120 (12)                  | 116 (26) | 98 (36)  | 82 (40)  | 74 (43)  | 66 (44)  |
| <b>Accuracy</b>                                                                  | 0.81                      | 0.75     | 0.67     | 0.74     | 0.69     | 0.8      |
| <b>Sensitivity</b>                                                               | 0.33                      | 0.62     | 0.67     | 0.75     | 0.77     | 0.82     |
| <b>Specificity</b>                                                               | 0.86                      | 0.79     | 0.68     | 0.74     | 0.58     | 0.77     |
| <b>Positive Predictive Value</b>                                                 | 0.21                      | 0.46     | 0.55     | 0.73     | 0.72     | 0.88     |
| <b>Negative Predictive Value</b>                                                 | 0.92                      | 0.88     | 0.78     | 0.76     | 0.64     | 0.68     |
| <b>Matthews Correlation Coefficient</b>                                          | 0.16                      | 0.37     | 0.33     | 0.49     | 0.35     | 0.57     |
